# Supplementary material
Source: PubMed Central journal article supplement (PMC5985514)
Supplement: NIHMS969366-supplement-SI.pdf [file NIHMS969366-supplement-SI.pdf]

SUPPORTING INFORMATION FOR

**Cosolute and Crowding Effects on a Side-By-Side Protein Dimer**

Alex J. Guseman,<sup>†</sup> and Gary J. Pielak<sup>\*,†,‡,§</sup>

<sup>†</sup>Department of Chemistry, <sup>‡</sup>Department of Biochemistry and Biophysics, <sup>§</sup>Lineberger  
Comprehensive Cancer Center, University of North Carolina at Chapel Hill, Chapel Hill,  
North Carolina, 27599, United States

\*Corresponding Author

## Deconvolution

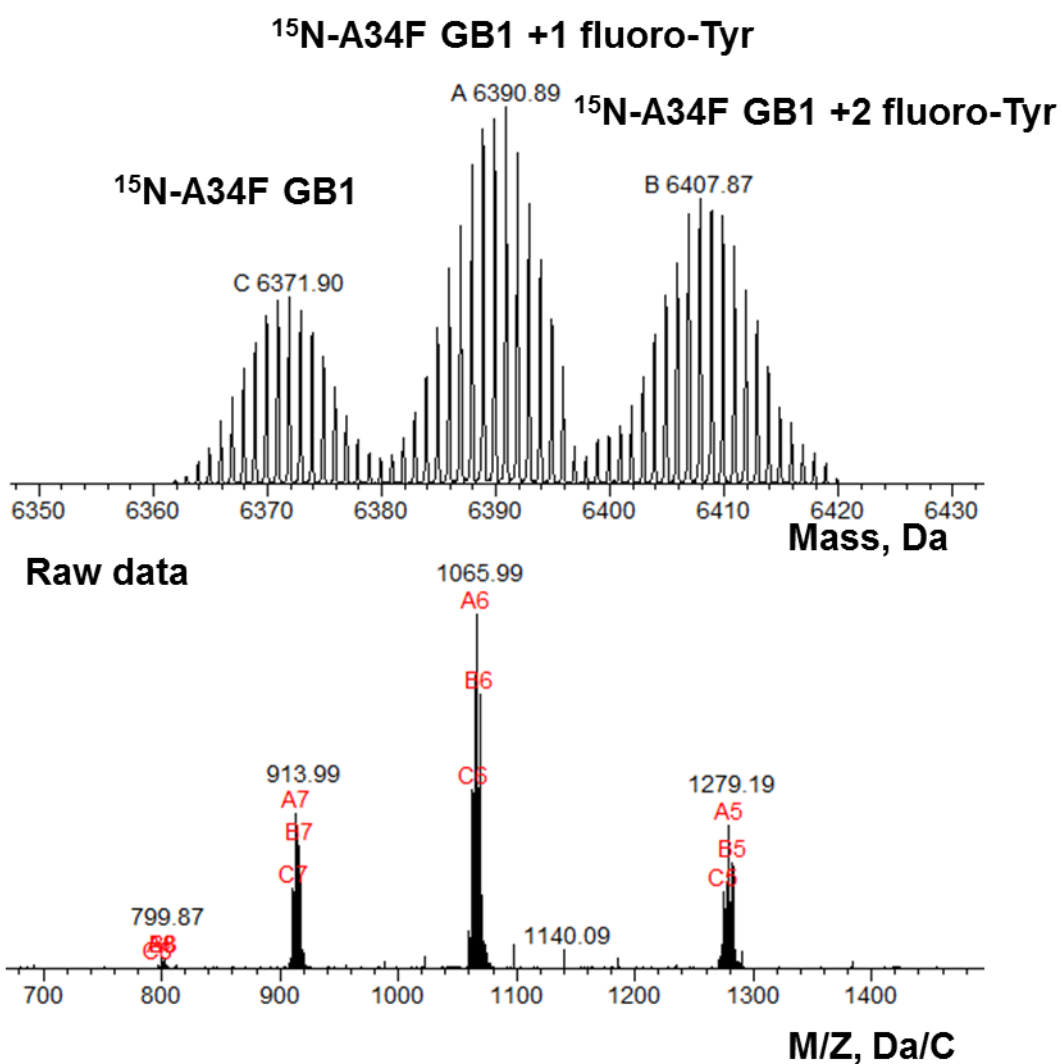

Figure S1: ESI-FT-ICR analysis of fluorinated A34F GB1 reveals 3 populations of fluorinated GB1 containing 0 (6371.90 Da), 1 (6390.89 Da), or 2 (6407.87 Da) fluorotyrosine residues.

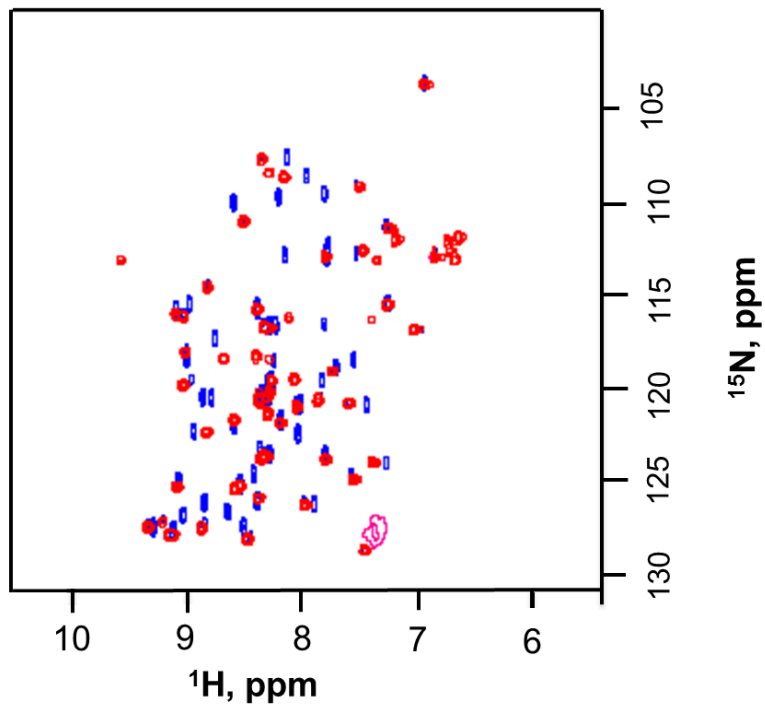

Figure S2:  $^1\text{H}$ - $^{15}\text{N}$  HSQC spectrum of A34F GB1 dimer (3.3 mM, red) and  $^1\text{H}$ - $^{15}\text{N}$  HMQC spectrum of A34F GB1 monomer (10  $\mu\text{M}$ , blue) show chemical shift changes between monomer and dimer states, consistent with published spectra.<sup>1</sup>

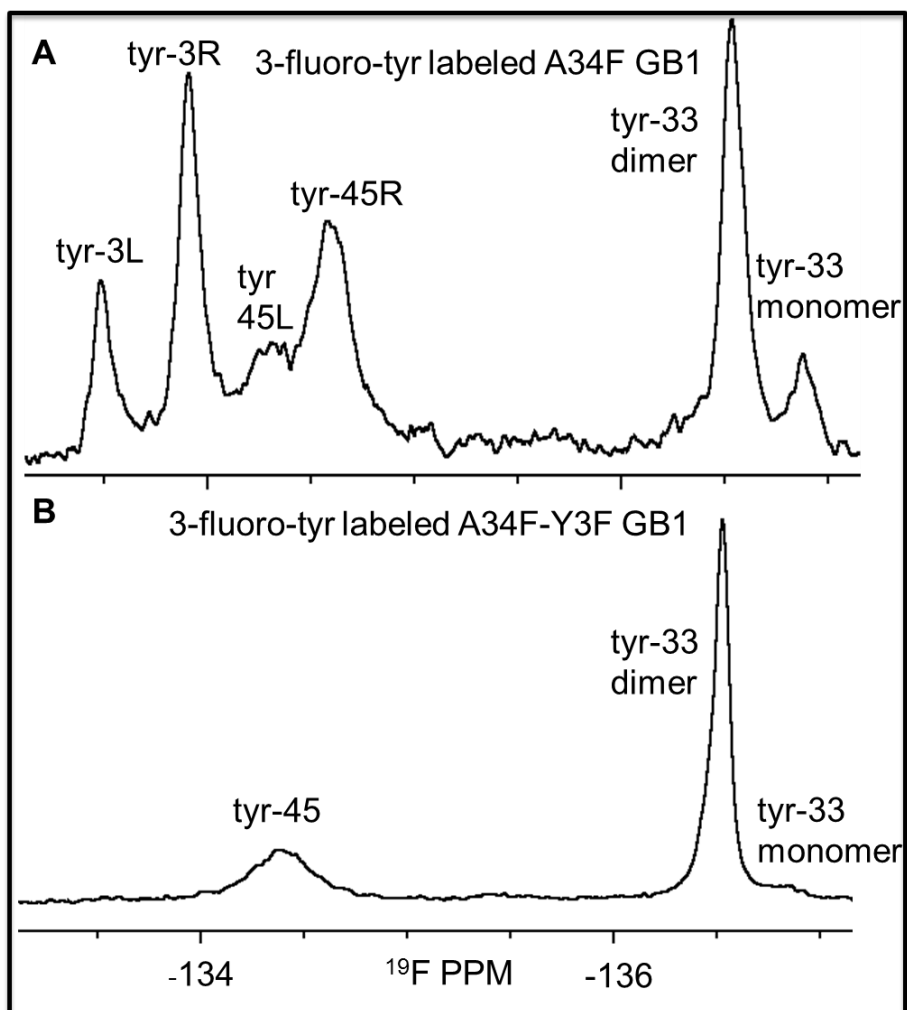

Figure S3: (A)  $^{19}\text{F}$  NMR spectrum of A34F GB1 shows six peaks, two for Tyr-45 and two Tyr-3, all 4 are in slow exchange, and two resonances near -136.5 ppm that correspond to Tyr-33 in the dimer state (upfield) and monomer state (down field). (B) Peaks were assigned using published data<sup>2</sup> and the A34F Y3F variant data shown here.

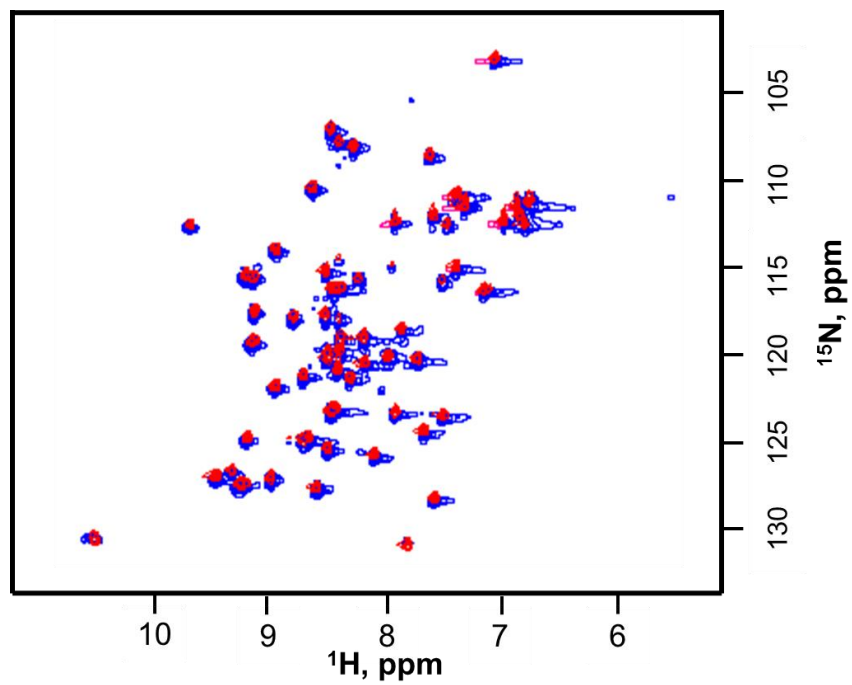

Figure S4:  $^1\text{H}$ - $^{15}\text{N}$  HSQC spectra of  $^{19}\text{F}$ -labeled,  $^{15}\text{N}$  enriched GB1 (red) and  $^{15}\text{N}$ -enriched A34F GB1 (blue) indicate that labeling has a small effect on A34F GB1 structure.

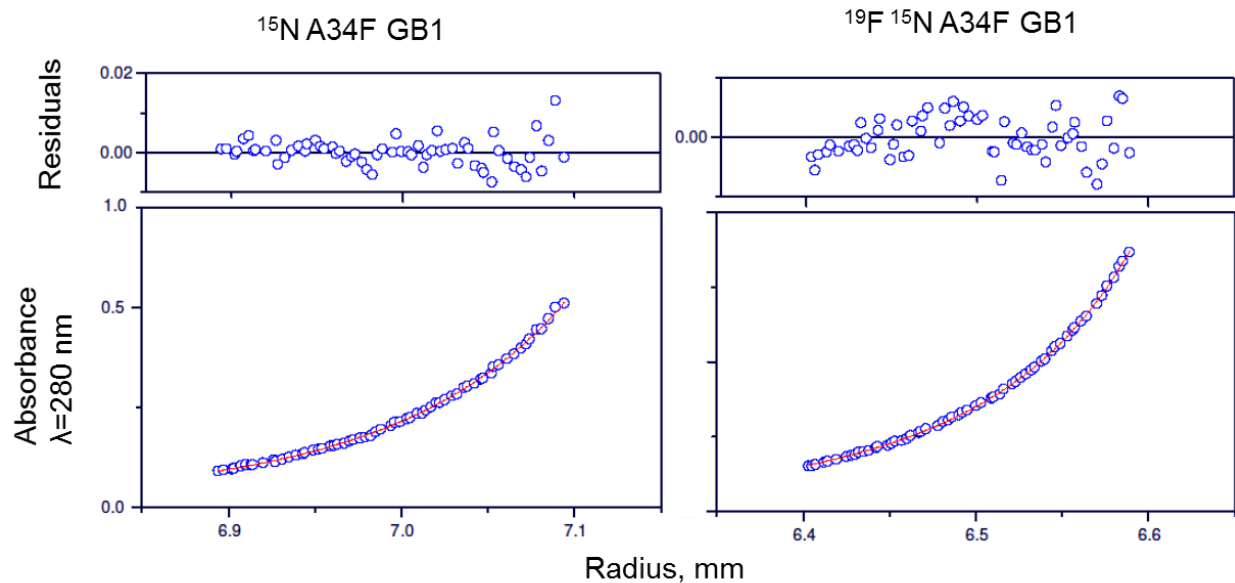

Figure S5: Equilibrium ultracentrifugation data for  $^{15}\text{N}$ -enriched A34F GB1 and  $^{19}\text{F}$ -labeled  $^{15}\text{N}$ -enriched A34F GB1 yield the same dissociation constant and uncertainty ( $59 \pm 10 \mu\text{M}$ ), showing that labeling does not affect dimerization. Samples were spun at 34,000 rpm and  $25^\circ\text{C}$  for 36 h in a Beckman XL-A ultracentrifuge. Data were fit using Origin 6.03 software (OriginLab Corp.).

- (1) Jee, J., Byeon, I.-J. L., Louis, J. M., and Gronenborn, A. M. (2008) The point mutation A34F causes dimerization of GB1. *Proteins* 71, 1420-1431.
- (2) Ye, Y., Liu, X., Zhang, Z., Wu, Q., Jiang, B., Jiang, L., Zhang, X., Liu, M., Pielak, G. J., and Li, C. (2013)  $^{19}\text{F}$  NMR spectroscopy as a probe of cytoplasmic viscosity and weak protein interactions in living cells. *Chem. -Eur. J.* 19, 12705-12710.
